# Supplementary material for: A pan-cancer analysis of DDR1 in prognostic signature and tumor immunity, drug resistance
Source: Sci Rep. 2023 Apr 8;13:5779. doi: 10.1038/s41598-023-27975-9 (PMC10082773; doi:10.1038/s41598-023-27975-9)
Supplement: Supplementary file 3 — Supplementary Table S1. [file 41598_2023_27975_MOESM3_ESM.xlsx]

## Sheet: expression
Differential expression of DDR1 in pan-cancer
Cancer Type	TCGA database		TCGA+GTEx databases
	Normal mean	Tumor mean	Normal mean	Tumor mean
ACC	Not available	4.26472	4.72282	4.26472
BLCA	4.18783	5.21049	4.46861	5.21049
BRCA	4.49428	5.38537	4.7108	5.38537
CESC	2.95822	5.57606	4.02593	5.57606
CHOL	1.15912	5.13804	Not available	5.13804
COAD	5.19253	5.18985	Not available	5.18985
DLBC	Not available	1.08228	0.989034	1.08228
ESCA	4.57803	5.54081	4.79131	5.54081
GBM	4.94052	6.46924	5.24245	6.46924
HNSC	4.84248	5.47045	Not available	5.47045
KICH	5.26432	6.01464	5.06552	6.01464
KIRC	4.81988	4.27873	4.84761	4.27873
KIRP	5.1199	5.53276	5.06024	5.53276
LAML	Not available	0.557412	1.29657	0.557412
LGG	Not available	6.80922	5.10183	6.80922
LIHC	1.1234	1.83357	1.468	1.83357
LUAD	4.26183	5.03285	4.33487	5.03285
LUSC	4.17713	5.78293	4.33651	5.78293
MESO	Not available	4.61736	Not available	4.61736
OV	Not available	5.55373	4.32543	5.55373
PAAD	4.41633	5.20059	5.34877	5.20059
PCPG	3.32534	3.44271	4.46821	3.44271
PRAD	4.99714	4.85679	5.1489	4.85679
READ	4.77022	5.25312	Not available	5.25312
SARC	3.34704	2.14067	Not available	2.14067
SKCM	3.75971	3.97762	5.05005	3.97762
STAD	4.07167	4.97959	4.77664	4.97959
TGCT	Not available	3.79065	3.61638	3.79065
THCA	5.23078	5.61682	5.54783	5.61682
THYM	4.52871	5.23612	Not available	5.23612
UCEC	3.81958	4.97631	3.81958	4.97631
UCS	Not available	4.16566	3.03793	4.16566
UVM	Not available	3.85185	Not available	3.85185

## Sheet: DNA methylation  
Association between DDR1 expression and DNA Methylation in pan-cancer
Cancer Type	DNA methylation
	Correlation	fdr
ACC	-0.485565	7.57195e-06
BLCA	-0.540082	0
BRCA	-0.446209	0
CESC	-0.368592	4.46494e-11
CHOL	-0.637323	4.3732e-05
COAD	-0.357179	1.97898e-09
DLBC	-0.317629	0.0282601
ESCA	-0.569613	0
GBM	-0.437376	0.00147077
HNSC	-0.441716	0
KICH	-0.292057	0.0176424
KIRC	-0.48942	0
KIRP	-0.577678	0
LAML	-0.396137	1.15407e-07
LGG	-0.331815	1.34369e-14
LIHC	-0.54758	0
LUAD	-0.452353	0
LUSC	-0.558616	0
MESO	-0.618375	0
OV	-0.633333	0.0760362
PAAD	-0.574202	0
PCPG	-0.40807	1.93704e-08
PRAD	-0.483154	0
READ	-0.414145	4.7584e-05
SARC	-0.604477	0
SKCM	-0.522505	0
STAD	-0.576515	0
TGCT	-0.730416	0
THCA	-0.496522	0
THYM	-0.814952	0
UCEC	-0.361395	1.32323e-06
UCS	-0.734249	0
UVM	-0.640624	0

## Sheet: RNA methylation 
Association between DDR1 expression and m6A, m5C, and m1A-related genes in pan-cancer
Cancer Type	RNA methylation
	TRMT10C		TRMT61B		YTHDF2		YTHDF3		YTHDC1		ALKBH3		NSUN2		NSUN3		NSUN4		NSUN5		NSUN7		DNMT3A		TET2														NOP2		ALYREF		TET2		METTL3		ZC3H13		ALKBH5
	Correlation	P-value	Correlation	P-value	Correlation	P-value	Correlation	P-value	Correlation	P-value	Correlation	P-value	Correlation	P-value	Correlation	P-value	Correlation	P-value	Correlation	P-value	Correlation	P-value	Correlation	P-value	Correlation	P-value													Correlation	P-value	Correlation	P-value	Correlation	P-value	Correlation	P-value	Correlation	P-value	Correlation
ACC	0.164309	0.147899	0.117581	0.302069	0.21497	0.0570991	0.402851	0.000232491	0.449862	3.19105e-05	0.210376	0.062752	0.0264224	0.817202	0.359387	0.00114276	0.107592	0.345271	-0.0202143	0.859647	0.0821522	0.47167	0.0433406	0.704496	0.427479	8.5192e-05													0.165245	0.145574	0.117033	0.304342	-0.0977664	0.39135	0.327688	0.00319851	0.043789	0.701582	0.154603
BLCA	0.125231	0.01105	0.210159	1.74166e-05	0.150689	0.00219024	0.0993604	0.044094	0.328609	8.35698e-12	-0.0965183	0.0505435	0.16955	0.000556713	0.125379	0.0109547	0.253737	1.84852e-07	-0.118422	0.0163088	0.171227	0.000489348	0.0415535	0.400787	0.312327	9.46585e-11													-0.0430855	0.383632	-0.0135288	0.784509	-0.0571045	0.248048	0.0190128	0.700749	-0.0314778	0.524537	-0.021315
BRCA	-0.0159823	0.595788	0.189804	2.05403e-10	0.0185518	0.538049	-0.000520241	0.986224	0.158294	1.24369e-07	-0.0845955	0.00491318	0.068464	0.0229112	0.0431857	0.151585	0.0936006	0.00184987	0.166516	2.61576e-08	0.155657	2.01689e-07	0.0276541	0.358627	-0.0434742	0.148868													0.171043	1.07e-08	0.0479973	0.11096	-0.180726	1.47e-09	-0.178156	2.51e-09	-0.171232	1.03e-08	0.0316881
CESC	-0.0799149	0.163182	0.358948	9.78594e-11	0.0253052	0.659272	0.249969	9.63406e-06	0.380451	5.62985e-12	-0.0608715	0.288489	0.0419704	0.464473	0.34711	4.31361e-10	0.228721	5.3849e-05	-0.183096	0.00129534	0.163419	0.00415355	0.0596098	0.298618	0.381489	4.87882e-12													0.122536	0.0321286	0.0710412	0.215273	-0.0890235	0.120187	-0.0358585	0.532036	0.0721996	0.207867	0.133725
CHOL	-0.265289	0.117882	0.278077	0.100559	-0.343291	0.0403827	0.142124	0.408318	0.282273	0.0953202	-0.0715984	0.678169	-0.256252	0.13141	-0.182595	0.286469	0.0380838	0.825468	-0.296591	0.079002	0.35798	0.032058	0.379007	0.0226328	0.235994	0.165852													-0.329305	0.049857	-0.361119	0.0304752	0.0526981	0.760182	0.0804164	0.641053	0.239471	0.159522	0.115102
COAD	-0.227973	5.71975e-07	-0.0507174	0.271995	-0.0785125	0.0887513	-0.287825	1.95142e-10	0.0124227	0.788008	-0.0252433	0.584739	0.0226657	0.623667	-0.315831	2.2747e-12	-0.195377	1.95365e-05	0.409054	2.00151e-20	0.070544	0.126309	0.102814	0.0256604	-0.312738	3.80854e-12													-0.00263667	0.954489	0.0839272	0.0687886	-0.0264307	0.567194	0.00287265	0.950421	-0.0050366	0.913189	-0.0903524
DLBC	0.0137143	0.926289	-0.0291717	0.843967	0.0530553	0.720238	0.0764325	0.605618	0.0613993	0.67846	-0.0209005	0.887869	0.202972	0.166478	-0.0922781	0.532758	-0.178671	0.224349	-0.209465	0.153043	0.0492172	0.739738	-0.0159149	0.914502	0.0476678	0.747658													0.0808295	0.306545	-0.123658	0.116941	-0.311663	5.41e-05	0.0527267	0.505175	0.163029	0.0381868	-0.1648
ESCA	0.146649	0.0625803	0.329128	1.89912e-05	0.123455	0.117548	0.00558284	0.943789	0.125612	0.111225	0.0974121	0.217505	0.222181	0.00448865	0.349142	5.27448e-06	0.182333	0.0202197	-0.0830808	0.293224	-0.0135081	0.864533	0.106657	0.176738	0.113469	0.150523													-0.274377	0.000319313	0.0725168	0.350233	-0.356716	2.07e-06	-0.273028	0.000342672	-0.318637	2.56e-05	-0.135423
GBM	-0.203732	0.00807811	0.0359918	0.64324	-0.121158	0.117715	-0.193823	0.0118227	0.353306	2.63274e-06	-0.120807	0.118792	0.136394	0.0779149	-0.204009	0.0079904	-0.0593495	0.444755	0.181985	0.0182292	0.277756	0.000267141	0.0715028	0.357028	0.0933838	0.228594													0.164615	0.000211926	0.12857	0.00390829	-0.104094	0.0196588	0.105584	0.0179633	-0.0452306	0.311826	0.0143942
HNSC	0.138256	0.00190363	0.465147	2.57303e-28	0.257516	4.78772e-09	0.269049	8.98745e-10	0.425483	1.72113e-23	-0.115144	0.00982285	0.285896	6.73983e-11	0.4687	8.84132e-29	0.268304	1.00375e-09	-0.0510376	0.2537	0.309374	1.35089e-12	0.424807	2.05388e-23	0.369672	1.05895e-17													-0.343728	0.00505643	-0.069981	0.579621	0.0222917	0.860093	-0.0556181	0.659903	0.234946	0.0595777	0.21218
KICH	0.409754	0.000699979	-0.0360782	0.775399	-0.0780753	0.536447	0.0469696	0.710237	0.021692	0.86382	0.109124	0.386872	0.0282265	0.823381	0.267525	0.0312055	-0.35355	0.00386421	-0.261261	0.0355403	0.619128	3.85038e-08	-0.572652	6.21495e-07	0.329612	0.00733529													-0.287118	1.3e-11	-0.0644334	0.136643	-0.0358712	0.407654	-0.159587	0.000210218	0.0424891	0.326632	-0.123916
KIRC	0.103869	0.0162447	0.257991	1.39372e-09	0.0808476	0.0616649	0.122094	0.00468347	0.312569	1.37185e-13	0.0583763	0.177581	0.0110489	0.798745	0.108353	0.0121504	0.189687	9.99009e-06	-0.0278556	0.520277	0.453134	1.89987e-28	-0.00498374	0.908441	0.234345	4.15118e-08													-0.294208	3.52e-07	-0.075846	0.198566	-0.176195	0.0026481	-0.239923	3.77e-05	-0.0159698	0.786909	-0.00983649
KIRP	0.0299	0.61271	0.198734	0.000679321	0.179794	0.00215289	0.147725	0.0119288	0.540297	2.6495e-23	0.0716359	0.224712	0.1479	0.0118268	0.208365	0.000362371	0.283589	9.53017e-07	0.24196	3.21847e-05	0.444843	1.89007e-15	0.327559	1.18095e-08	0.451055	6.86572e-16													-0.0478465	0.559627	-0.00188692	0.981655	-0.117064	0.152292	-0.290276	0.000299779	0.097125	0.235472	0.0743514
LAML	-0.145784	0.0740839	0.0450739	0.582625	-0.0954614	0.243628	-0.165641	0.0420944	0.0410887	0.616426	-0.0584075	0.476237	0.107757	0.187848	0.182883	0.0246005	0.0757591	0.355207	-0.214028	0.0083195	0.0880577	0.282299	0.244928	0.0024373	-0.00140756	0.986315													0.221141	2.78e-07	0.24118	1.94e-08	-0.0865951	0.046512	-0.00168714	0.96912	-0.312251	1.99e-13	0.0378918
LGG	0.098046	0.0241233	0.2565	2.15105e-09	-0.203075	2.4914e-06	0.191042	9.67136e-06	0.249785	5.74423e-09	0.0411824	0.344477	0.191691	9.00842e-06	0.224456	1.81851e-07	-0.112619	0.00953165	0.090174	0.0381423	0.101225	0.0198778	0.108775	0.0123032	0.3761	3.21932e-19													-0.292216	8.49e-09	-0.398136	1.17e-15	-0.254936	5.84e-07	-0.212994	3.28e-05	-0.0100193	0.846865	-0.12051
LIHC	0.137175	0.00789486	0.253494	6.78936e-07	0.287532	1.49622e-08	0.167403	0.00115589	0.551934	3.34102e-31	-0.000323927	0.995018	0.257799	4.31308e-07	0.280341	3.50051e-08	0.303337	2.12059e-09	0.257838	4.29505e-07	0.359029	8.05709e-13	0.511851	2.30925e-26	0.432875	1.63721e-18													-0.0587108	0.178796	-0.165432	0.000138181	-0.0882981	0.0429469	-0.0850498	0.0512376	-0.0963922	0.0270624	-0.0929201
LUAD	-0.171795	7.48939e-05	-0.021748	0.618726	0.106637	0.0144115	-0.178361	3.88925e-05	0.135429	0.00185208	0.108816	0.0125202	0.0613456	0.160045	-0.105396	0.0155967	0.0689642	0.114155	0.181598	2.79121e-05	0.140117	0.00127389	0.0638447	0.143668	-0.100962	0.0205611													-0.06602	0.140039	0.0512959	0.251776	-0.156469	0.000439462	-0.0587891	0.188938	-0.211711	1.74e-06	-0.0348471
LUSC	0.0408244	0.361836	0.172242	0.000106771	-0.0297697	0.506166	-0.102238	0.0220979	0.223688	4.22487e-07	0.141789	0.00146348	0.237936	7.04475e-08	0.167687	0.000162788	0.0463971	0.299982	-0.00416688	0.925876	-0.0253725	0.570995	0.308526	1.64738e-12	0.295464	1.49795e-11													0.0422701	0.411897	0.136745	0.00767888	-0.325824	8.01e-11	-0.16894	0.000960607	-0.204013	6.31e-05	-0.18287
MESO	0.281648	0.00861198	0.19371	0.0739249	0.0903866	0.407874	0.292727	0.00623603	0.202728	0.0612071	0.0042314	0.969156	0.0323815	0.767247	0.354731	0.000804665	-0.135365	0.213984	0.150267	0.167284	0.23667	0.0282395	0.116196	0.286694	-0.046798	0.668745													0.0102917	0.891549	0.00378894	0.959967	0.0866975	0.249852	0.00888912	0.906256	0.137662	0.066887	-0.144302
OV	-0.0365921	0.477544	0.0909484	0.0769948	0.0954994	0.0632713	0.0572862	0.265935	0.267618	1.22618e-07	-0.0492737	0.338735	0.222376	1.24402e-05	0.234676	3.87068e-06	0.199017	9.58995e-05	-0.00717047	0.889344	0.28236	2.23143e-08	0.101261	0.0488513	0.217828	1.88476e-05													0.150235	0.0423617	-0.00462032	0.950503	-0.30154	3.35e-05	-0.0177005	0.812017	-0.220829	0.00266431	0.0143019
PAAD	-0.0786917	0.296438	0.0648126	0.390054	0.0264254	0.726236	0.0898638	0.232908	0.182511	0.014754	-0.116164	0.122556	0.205231	0.00599321	0.190598	0.0108224	0.0548594	0.467038	0.238421	0.00135124	0.338962	3.68824e-06	0.0628689	0.404455	0.200745	0.00721376													0.0716504	0.109912	0.235925	9.69e-08	-0.137667	0.00205464	0.0837377	0.0616017	-0.126739	0.00457558	0.0107137
PCPG	0.0670224	0.367342	0.448979	1.8331e-10	0.408977	9.02991e-09	0.407442	1.03836e-08	0.448301	1.9666e-10	-0.0523846	0.481263	0.239423	0.00109745	0.261445	0.000350355	0.279717	0.000125643	-0.0583346	0.432807	0.0043951	0.952913	0.26131	0.000352915	0.344143	1.8414e-06													-0.129399	0.0955815	0.0389573	0.617182	-0.114179	0.141765	-0.152978	0.048417	0.0733412	0.346229	-0.0475248
PRAD	0.0424869	0.343572	0.415919	2.70463e-22	0.259375	4.0927e-09	0.216523	1.04664e-06	0.347734	1.25136e-15	-0.0288037	0.520908	0.322223	1.6125e-13	0.352925	4.40225e-16	0.367091	2.30322e-17	-0.111657	0.0125677	0.279709	2.01845e-10	0.188259	2.30864e-05	0.275758	3.69449e-10													0.126189	0.0408678	0.240455	8.19e-05	-0.210824	0.000578579	-0.0404471	0.513702	-0.228641	0.000184065	-0.082461
READ	-0.307763	5.21116e-05	-0.0129594	0.867983	-0.0838118	0.281548	-0.122551	0.11462	0.0155291	0.842118	-0.166952	0.031049	0.0268352	0.730662	0.053786	0.489975	-0.0631575	0.417449	0.097416	0.210418	0.0979372	0.207976	-0.0551023	0.4794	-0.0773052	0.320716													-0.0698459	0.130113	-0.0709232	0.124279	0.14054	0.00223442	0.189151	3.6e-05	0.081728	0.0764018	-0.049246
SARC	0.109107	0.0773499	0.28833	1.98433e-06	0.0160649	0.7954	0.26642	1.18983e-05	0.401362	1.33719e-11	-0.223817	0.000253261	0.255497	2.74638e-05	0.370342	5.67698e-10	0.0969663	0.116709	-0.10916	0.0772064	0.359357	1.95262e-09	0.386637	8.32291e-11	0.359397	1.94402e-09													0.215319	2.61e-05	0.114507	0.0266012	-0.0735214	0.155344	0.10939	0.0342069	0.0687317	0.184141	-0.121844
SKCM	-0.0269518	0.559574	-0.0235094	0.610803	-0.0161581	0.726516	-0.111131	0.0158268	-0.0762972	0.0981569	0.136779	0.00293407	-0.0298915	0.51754	-0.0283014	0.540073	0.0296359	0.521128	0.0932828	0.0430209	0.10174	0.0272523	-0.129924	0.00474028	-0.0701181	0.12862													-0.0368196	0.648151	0.134107	0.0951017	-0.196108	0.014145	0.00884801	0.912707	-0.197974	0.0132353	-0.204251
STAD	-0.0432272	0.403894	-0.00588815	0.90952	0.0539368	0.297527	0.0577513	0.264616	-0.0217202	0.675029	-0.0768949	0.137202	0.168171	0.00107907	0.0773725	0.13477	0.170003	0.000949078	0.197153	0.000121599	0.0910456	0.0782615	-0.1064	0.0394567	0.0655153	0.205576													0.105371	0.0172939	0.101007	0.0225302	-0.0687921	0.120765	0.0799528	0.0712241	0.0273775	0.537321	0.514913
TGCT	-0.294611	0.00018899	0.409425	1.11386e-07	-0.275159	0.000508108	0.164563	0.0400841	0.321589	4.2468e-05	0.246967	0.00188296	-0.238302	0.00273785	0.504933	1.79638e-11	-0.221531	0.00544791	-0.532863	8.03654e-13	0.406004	1.45251e-07	-0.0492718	0.541315	0.488119	1.02225e-10													0.0148268	0.729108	0.236956	1.97e-08	0.195574	3.98e-06	0.104744	0.014161	0.100027	0.0191758	0.251989
THCA	0.0214565	0.628796	0.339389	3.25364e-15	0.237282	5.85854e-08	0.306978	1.36695e-12	0.342075	1.90795e-15	-0.254811	5.31649e-09	0.244784	2.14538e-08	0.432778	1.07564e-24	0.133482	0.00252287	-0.100255	0.0235605	0.170863	0.000105447	0.118339	0.00746595	0.25369	6.23305e-09													0.0658582	0.629631	-0.124896	0.359062	-0.320448	0.0160492	-0.0220038	0.87212	-0.206345	0.127062	0.0018487
THYM	0.110559	0.231307	0.602889	4.01499e-13	0.188234	0.0403563	0.637085	6.75004e-15	0.549997	9.2466e-11	-0.475143	4.7594e-08	0.256867	0.00480259	0.481068	3.06143e-08	0.259099	0.00443605	-0.676258	3.18518e-17	0.635875	7.86773e-15	-0.250989	0.0059	0.693447	2.32135e-18
UCEC	-0.073457	0.0858002	0.262981	4.03799e-10	0.00491106	0.90868	0.0613121	0.151758	0.208259	8.73816e-07	-0.0854691	0.0455141	0.145548	0.00063172	0.199563	2.49626e-06	0.242558	8.85751e-09	-0.0331318	0.438909	0.281263	2.01413e-11	0.14413	0.000714418	0.0987481	0.0207772
UCS	-0.0364152	0.789894	0.369022	0.00513013	0.11193	0.411475	-0.02027	0.882121	0.365557	0.00559753	-0.0290376	0.831763	-0.156547	0.249243	0.426921	0.00103323	0.277736	0.0382209	-0.144922	0.286571	0.498054	9.38457e-05	0.250011	0.0631198	0.331355	0.0126091
UVM	0.0836887	0.460484	-0.0617307	0.586465	-0.0343768	0.762099	-0.144777	0.200087	0.110064	0.331097	-0.124525	0.271095	-0.190302	0.0908727	0.13185	0.243681	-0.138566	0.220276	0.178023	0.114135	0.311815	0.00486816	-0.194821	0.0833193	0.0033429	0.976522
[truncated: 1 more columns]

## Sheet: MMR
Association between DDR1 expression and mismatch repair (MMR) gene in pan-cancer
Cancer Type
	MLH1		MSH2		MSH3		MSH4		MSH5		MSH6		PMS1		PMS2
	Correlation	P-value	Correlation	P-value	Correlation	P-value	Correlation	P-value	Correlation	P-value	Correlation	P-value	Correlation	P-value	Correlation	P-value
ACC	0.150231	0.186332	0.0494784	0.664993	0.240579	0.0327038	0.0452976	0.69181	0.0442132	0.698829	0.0324782	0.776298	-0.024522	0.830146	0.24257	0.830146
BLCA	-0.04931	0.318652	0.0190514	0.700171	0.244965	4.95905e-07	-0.108552	0.0277716	0.0833916	0.0913342	-0.0209422	0.672064	0.0694468	0.159928	0.234352	0.159928
BRCA	0.105595	0.000440743	0.0334186	0.267243	0.16864	1.72634e-08	-0.0835224	0.00548858	0.0645738	0.0319233	0.0400164	0.18397	-0.0839555	0.00524944	0.17537	0.00524944
CESC	0.221689	9.19613e-05	0.255606	5.94269e-06	0.284829	4.03215e-07	0.0414862	0.469647	0.321012	9.18158e-09	0.309934	3.08813e-08	0.185701	0.00110014	0.32094	0.00110014
CHOL	-0.0814017	0.636957	0.16065	0.349283	-0.00591947	0.972667	0.163238	0.341472	0.0845409	0.623976	0.227246	0.182575	0.0785771	0.648729	0.255981	0.648729
COAD	-0.0121788	0.792074	-0.145962	0.00149134	-0.166275	0.000289786	-0.267967	3.45201e-09	-0.0465904	0.312979	-0.139798	0.00235914	-0.355603	1.74028e-15	-0.0139478	1.74028e-15
DLBC	-0.195262	0.183519	-0.0867061	0.557884	0.0873294	0.555045	0.214104	0.143944	-0.0501428	0.73502	-0.0728166	0.62283	-0.0152384	0.918123	-0.00350612	0.918123
ESCA	-0.0884454	0.263053	0.159418	0.0427318	0.149278	0.0579704	-0.121809	0.122558	0.0846303	0.284282	0.258477	0.000896909	-0.0312658	0.69287	0.26313	0.69287
GBM	0.0452266	0.560483	0.131974	0.0881433	0.309804	4.37867e-05	-0.0865037	0.264878	0.178771	0.0204194	0.0186531	0.81034	-0.0380438	0.624417	0.303138	0.624417
HNSC	0.163892	0.000226142	0.407075	1.85145e-21	0.308163	1.66728e-12	0.0390938	0.382085	0.354342	2.68956e-16	0.407975	1.48312e-21	0.23313	1.2687e-07	0.421986	1.2687e-07
KICH	0.165327	0.188132	-0.426174	0.000400644	-0.0130373	0.917903	0.0974182	0.440109	-0.532376	5.00677e-06	-0.474921	6.40717e-05	-0.480546	5.0913e-05	0.276929	5.0913e-05
KIRC	0.205021	1.73606e-06	0.0898711	0.0377029	0.139478	0.0012189	-0.153987	0.000350578	0.00662707	0.878455	0.0486887	0.260926	-0.053967	0.212673	0.384282	0.212673
KIRP	0.32008	2.62372e-08	0.254924	1.14595e-05	0.204925	0.000455059	0.0328448	0.578148	0.232129	6.78691e-05	0.232603	6.55166e-05	0.153535	0.00894111	0.435916	0.00894111
LAML	-0.00141694	0.986224	0.0333219	0.684613	-0.0034068	0.966885	-0.0917178	0.262695	-0.115733	0.157041	0.0716576	0.381927	-0.109776	0.179663	0.0659321	0.179663
LGG	0.187506	1.41833e-05	-0.121629	0.00509029	0.158775	0.000245933	-0.177497	4.03569e-05	0.130273	0.00268226	0.0994407	0.0221726	0.0820588	0.0592857	0.15771	0.0592857
LIHC	0.260176	3.3455e-07	0.475819	1.58026e-22	0.0800247	0.12237	0.254964	5.82005e-07	0.387152	8.03194e-15	0.403229	4.69017e-16	0.417611	3.2327e-17	0.352269	3.2327e-17
LUAD	-0.141517	0.00113662	-0.0662197	0.129322	-0.0336376	0.441388	-0.252774	4.12154e-09	0.0395517	0.365305	-0.0118924	0.785537	-0.252219	4.46683e-09	0.0629464	4.46683e-09
LUSC	-0.183103	3.73862e-05	0.07427	0.0968081	-0.0145484	0.745301	-0.127795	0.00416934	0.206567	3.12498e-06	0.280247	1.70843e-10	-0.0168183	0.707265	0.234445	0.707265
MESO	0.000154139	0.998876	0.0841662	0.44102	0.361286	0.000631733	0.137131	0.208012	0.125649	0.249016	0.0576014	0.598336	-0.0840079	0.441883	0.398899	0.441883
OV	0.193848	0.0001462	0.039761	0.440225	0.100465	0.0506611	0.125621	0.0143972	0.323387	1.12614e-10	0.16079	0.00168732	0.0447469	0.385018	0.260593	0.385018
PAAD	-0.172659	0.0211857	0.0976326	0.194802	0.232585	0.00178309	0.0126453	0.866955	0.400498	3.03708e-08	-0.153753	0.0404559	-0.0923248	0.220309	0.177741	0.220309
PCPG	0.168988	0.0222058	0.263738	0.000309268	0.128187	0.0837484	0.042103	0.571457	-0.0128436	0.862996	0.406173	1.16476e-08	0.0763932	0.304021	0.306064	0.304021
PRAD	0.385036	4.41936e-19	0.313198	8.08616e-13	0.326739	7.04868e-14	-0.105819	0.0180533	0.152063	0.00065405	0.249801	1.54897e-08	0.088261	0.0487806	0.378615	0.0487806
READ	-0.115231	0.138107	-0.18326	0.0177608	-0.0535178	0.492146	0.107216	0.16786	0.106233	0.171818	-0.290902	0.000136815	-0.287628	0.000163888	0.116289	0.000163888
SARC	0.313289	2.12943e-07	0.346641	7.70328e-09	0.348873	6.08047e-09	0.149775	0.0150531	0.399527	1.68773e-11	0.319138	1.22402e-07	0.364222	1.13627e-09	0.172395	1.13627e-09
SKCM	-0.0266065	0.564617	-0.107107	0.020071	0.0272396	0.555387	-0.129623	0.00483895	0.0548671	0.234642	-0.0776934	0.0921413	-0.107498	0.0196198	0.0649372	0.0196198
STAD	-0.189647	0.000220912	0.0956278	0.0643303	-0.0452042	0.382718	0.00537509	0.917375	0.185771	0.00029807	-0.0584395	0.258956	-0.108557	0.0356067	0.0871439	0.0356067
TGCT	0.368255	2.24742e-06	-0.189266	0.0179645	0.151958	0.0582647	0.161476	0.0440259	0.456172	2.16883e-09	-0.23511	0.00313236	0.308604	8.87087e-05	0.528585	8.87087e-05
THCA	0.274253	2.98619e-10	0.558915	3.0557e-43	0.341414	2.17681e-15	0.0897826	0.0426934	0.0818711	0.0646781	0.33832	4.01698e-15	0.241664	3.27104e-08	0.263107	3.27104e-08
THYM	0.0737013	0.425692	0.179946	0.0501977	0.508457	3.55867e-09	0.262807	0.00388244	0.175229	0.0566339	-0.0795557	0.389759	0.261194	0.00411512	0.533979	0.00411512
UCEC	0.057264	0.180716	0.152588	0.000337262	0.178549	2.62237e-05	-0.0624789	0.144103	0.0399364	0.350756	0.137206	0.00128268	-0.0789458	0.0647854	0.205846	0.0647854
UCS	0.0790601	0.562457	0.296256	0.0266229	0.275592	0.0397995	-0.241381	0.073102	0.199743	0.139958	0.260269	0.0527111	0.278101	0.0379576	-0.0384109	0.0379576
UVM	0.131918	0.243433	0.038491	0.734624	0.0128161	0.910164	0.115551	0.307408	0.231656	0.038678	0.120104	0.288608	-0.0486882	0.66801	0.136313	0.66801

## Sheet: MSI 
Association between DDR1 expression and microsatellite instability (MSI) in pan-cancer
Cancer Type	MSI
	Correlation	P-value
BRCA	-0.00452551	0.884604
CESC	0.123388	0.0320682
CHOL	0.272587	0.107771
COAD	0.00927029	0.848523
ESCA	0.04063	0.609972
GBM	-0.10271	0.209496
HNSC	0.0615279	0.171271
KICH	-0.103223	0.413215
KIRC	0.112107	0.0402962
KIRP	0.00262356	0.964828
LAML	-0.0407684	0.741332
LGG	-0.0938307	0.0344902
LIHC	0.0195931	0.707564
LUAD	0.026425	0.551184
LUSC	0.224507	4.73746e-07
OV	-0.0193603	0.750593
PCPG	-0.0144738	0.847935
SKCM	0.0279558	0.546324
STAD	0.231649	5.99398e-06
TGCT	0.124797	0.128107
THCA	0.0289987	0.52148
UCEC	-0.0296126	0.493085
UCS	-0.313545	0.0186172
UVM	0.00645861	0.954658

## Sheet: TMB 
Association between DDR1 expression and tumor mutational burden (TMB) in pan-cancer
Cancer Type	TMB
	Correlation	P-value
ACC	0.0109455	0.923729
BLCA	-0.00443893	0.928774
BRCA	0.0402526	0.209429
CESC	-0.0196801	0.740346
CHOL	0.21216	0.214149
COAD	-0.0921876	0.0668598
DLBC	0.10147	0.548776
ESCA	-0.0932705	0.240757
GBM	0.182641	0.0262967
HNSC	0.134701	0.00275471
KICH	-0.205922	0.0998312
KIRC	0.000509166	0.992626
KIRP	0.0138894	0.817664
LAML	0.392131	0.00148059
LGG	-0.0227184	0.611944
LIHC	-0.159141	0.00249404
LUAD	-0.0820865	0.0658368
LUSC	0.00217953	0.961697
MESO	0.0367473	0.747817
OV	-0.033024	0.587622
PAAD	0.219281	0.00682656
PCPG	-0.0946112	0.210346
PRAD	-0.0871081	0.055994
READ	0.0039112	0.964499
SARC	-0.104416	0.110379
SKCM	0.0918326	0.0478025
STAD	0.280955	4.20268e-08
TGCT	0.152904	0.066345
THCA	-0.0975966	0.0321744
THYM	0.616982	1.28885e-13
UCEC	-0.090904	0.0373224
UCS	-0.381802	0.00368923
UVM	0.106226	0.348338

## Sheet: Tumor microenvironment 
Relationship between DDR1 expression and tumor microenvironment in pan-cancer
Cancer Type	Tumor microenvironment
	StromalScore		ImmuneScore
	Correlation	P-value	Correlation	P-value
ACC	-0.240531	0.0329771	-0.198247	0.0799329
BLCA	-0.378359	1.81834e-15	-0.247018	4.30994e-07
BRCA	-0.328839	0	-0.278062	5.91019e-21
CESC	-0.118317	0.0386441	-0.115136	0.0442114
CHOL	-0.157272	0.358243	-0.279279	0.0991455
COAD	-0.0894764	0.0523306	-0.139227	0.00247883
DLBC	0.0705601	0.632699	0.16967	0.248112
ESCA	-0.238578	0.00228812	-0.325247	2.66894e-05
GBM	-0.299675	8.54394e-05	-0.285499	0.000186699
HNSC	-0.210113	2.15833e-06	-0.232297	1.5334e-07
KICH	-0.090778	0.471103	-0.0883741	0.482966
KIRC	-0.281883	3.83568e-11	-0.207008	1.44728e-06
KIRP	-0.203078	0.000526193	-0.294118	4.03004e-07
LAML	0.263555	0.00111579	0.27297	0.000726229
LGG	0.00972416	0.823375	0.0515536	0.236441
LIHC	0.118872	0.021535	0.0805243	0.120013
LUAD	-0.204583	2.35137e-06	-0.282613	4.97305e-11
LUSC	-0.381997	0	-0.407297	0
MESO	-0.374404	0.000419939	-0.161149	0.138083
OV	-0.0892012	0.0828692	0.0188259	0.714748
PAAD	-0.504028	0	-0.431044	2.7483e-09
PCPG	-0.0283184	0.703289	-0.0649824	0.381792
PRAD	-0.0775996	0.083326	0.0182314	0.684443
READ	-0.0453585	0.560159	-0.136578	0.0784299
SARC	-0.516479	0	-0.382706	1.85423e-10
SKCM	-0.174761	0.000140972	-0.191837	2.87036e-05
STAD	-0.400894	0	-0.377455	4.78126e-14
TGCT	0.0354412	0.660154	-0.282755	0.000366769
THCA	-0.193334	1.14133e-05	-0.160712	0.000272859
THYM	0.204052	0.0261778	-0.645407	0
UCEC	-0.246517	5.59464e-09	-0.161724	0.000146165
UCS	-0.153657	0.257423	0.0924812	0.496774
UVM	-0.275223	0.0137163	-0.229512	0.0407786

## Sheet: Immune cell infiltration
Relationship between DDR1 expression and levels of tumor immune cell infiltration in pan-cancer
Cancer Type	Immune cell infiltration
	B cells naive		B cells memory		Plasma cells		T cells CD8		T cells CD4 naive		T cells CD4 memory resting		T cells CD4 memory activated		T cells follicular helper		T cells regulatory (Tregs)		T cells gamma delta		NK cells resting		NK cells activated		Monocytes		Macrophages M0		Macrophages M1		Macrophages M2		Dendritic cells resting		Dendritic cells activated		Mast cells resting		Mast cells activated		Eosinophils		Neutrophils
	Correlation	P-value	Correlation	P-value	Correlation	P-value	Correlation	P-value	Correlation	P-value	Correlation	P-value	Correlation	P-value	Correlation	P-value	Correlation	P-value	Correlation	P-value	Correlation	P-value	Correlation	P-value	Correlation	P-value	Correlation	P-value	Correlation	P-value	Correlation	P-value	Correlation	P-value	Correlation	P-value	Correlation	P-value	Correlation	P-value	Correlation	P-value	Correlation	P-value
ACC	-0.181819	0.484919	0.142222	0.58609	-0.365196	0.149976	0.0220588	0.935955	NA	1	0.321078	0.20858	-0.637496	0.00590771	-0.225628	0.383897	-0.0041161	0.987491	0.289272	0.260106	-0.438786	0.0780706	-0.221131	0.393698	-0.130222	0.618378	-0.73438	0.000787918	-0.438973	0.0779298	0.497549	0.0441844	0.671809	0.00314093	0.203932	0.4324	0.549949	0.0221881	-0.457752	0.0646535	NA	1	-0.430818	0.0842734
BLCA	-0.211825	0.000236045	0.189114	0.00105669	0.154787	0.0075814	-0.0532864	0.36014	NA	1	-0.0067137	0.908222	-0.0268868	0.644448	0.0705311	0.225552	-0.0236025	0.685404	NA	1	0.0975722	0.0932601	0.096554	0.0967441	-0.0954653	0.100583	-0.260337	5.45997e-06	-0.105716	0.0688654	-0.258571	6.84015e-06	0.178926	0.00196432	0.364864	8.79008e-11	-0.104111	0.0732104	0.103675	0.0744262	0.13982	0.0158953	0.203188	0.000425488
BRCA	-0.041796	0.187289	-0.0494618	0.118579	0.18577	3.66514e-09	0.0322974	0.308304	NA	1	-0.00302749	0.923925	NA	1	-0.0405487	0.200807	0.0395822	0.21176	NA	1	NA	1	0.0310479	0.327405	NA	1	-0.110761	0.000458798	0.0245119	0.439454	0.0562661	0.0757692	0.012701	0.688752	-0.103316	0.0010874	0.0406472	0.199714	-0.0736016	0.0201132	NA	1	0.00943483	0.766054
CESC	0.00276101	0.963381	0.077139	0.19893	0.0487883	0.416702	-0.0603488	0.315179	NA	1	0.107747	0.072371	-0.0760276	0.205497	-0.123072	0.0399478	0.00184755	0.975492	NA	1	-0.119693	0.0457734	-0.0289974	0.629608	0.0954682	0.111585	-0.211412	0.000376969	0.00466855	0.938122	-0.149855	0.0122104	0.177558	0.00291869	0.204299	0.000596001	0.103913	0.0831686	-0.0944413	0.115506	0.138277	0.0208647	-0.0626604	0.296966
CHOL	0.30233	0.0926057	-0.455256	0.00884027	-0.121345	0.508244	-0.21371	0.239199	NA	1	0.0168622	0.927369	NA	1	-0.145795	0.425917	0.176276	0.334503	-0.331851	0.0635217	-0.389989	0.0273462	0.512694	0.00269716	0.0534274	0.7715	-0.249358	0.168724	-0.0509531	0.781326	0.175953	0.333968	0.131181	0.474207	0.220386	0.22549	0.0775185	0.673244	-0.247596	0.171853	0.123104	0.50207	0.0236431	0.897799
COAD	0.0541577	0.289787	-0.0533229	0.297297	0.195614	0.000117682	-0.0186754	0.715261	NA	1	0.0250072	0.625034	-0.260866	2.15677e-07	-0.0806414	0.114643	0.0675796	0.186342	NA	1	-0.177797	0.000464094	0.0763026	0.135562	NA	1	0.113552	0.0260748	-0.175733	0.000541409	-0.0832275	0.103416	-0.0280457	0.583762	-0.0481759	0.346438	NA	1	-0.0157204	0.758789	-0.120739	0.0179353	-0.0570905	0.26442
DLBC	0.047831	0.746822	-0.18409	0.210377	-0.149114	0.311764	0.0701259	0.634799	NA	1	-0.238059	0.103223	0.30611	0.0343468	0.0121581	0.934668	NA	1	-0.0603018	0.683904	0.00869863	0.953208	0.201783	0.169026	-0.169899	0.248303	-0.0127008	0.931745	0.16663	0.256782	-0.347482	0.0159595	-0.133883	0.364294	NA	1	-0.140368	0.341308	0.15134	0.304513	NA	1	NA	1
ESCA	0.0730382	0.407072	-0.098561	0.262714	-0.0554796	0.528613	-0.0287438	0.744498	NA	1	-0.144456	0.0996955	-0.153042	0.0809574	0.0743612	0.398605	-0.108571	0.217057	NA	1	-0.00546214	0.950628	0.161824	0.0648059	NA	1	-0.0458921	0.602716	-0.209482	0.0163342	-0.136684	0.119448	0.214717	0.0137861	0.175217	0.0453121	0.0561675	0.523989	0.050686	0.565334	0.209636	0.0162538	-0.0123829	0.888364
GBM	0.426285	1.67418e-07	-0.341091	3.97357e-05	-0.23541	0.00527571	-0.0797193	0.350885	NA	1	-0.105206	0.217449	NA	1	-0.132873	0.11892	NA	1	NA	1	-0.0291406	0.733455	0.0142477	0.867787	NA	1	-0.230319	0.00637831	-0.0137565	0.872306	0.226199	0.00752726	NA	1	0.139348	0.10183	NA	1	0.0438591	0.608184	NA	1	-0.147174	0.0838352
HNSC	0.196468	1.646e-05	-0.11519	0.0120865	0.14335	0.00175473	-0.0261313	0.570366	NA	1	-0.0593205	0.197245	-0.0385848	0.40195	0.118691	0.00969833	-0.0354855	0.440839	NA	1	-0.095426	0.0378176	-0.0025461	0.95591	-0.0501567	0.275805	-0.0552514	0.229887	-0.0777301	0.0909524	-0.1578	0.000572737	0.0218341	0.635383	0.13059	0.00440175	0.0765752	0.0958721	-0.0997256	0.0299416	0.0961864	0.0363088	-0.171047	0.000182759
KICH	0.354425	0.0892627	-0.47777	0.0182163	-0.0647967	0.763561	-0.116522	0.58629	NA	1	-0.161739	0.448474	NA	1	-0.167972	0.43271	-0.23894	0.260819	0.0995182	0.643606	-0.000947793	0.996493	0.464348	0.0233998	-0.130028	0.544794	0.0724898	0.73641	0.210481	0.323539	-0.0730435	0.733947	NA	1	0.168628	0.43089	0.738872	3.72866e-05	-0.468663	0.0208877	-0.108916	0.612432	-0.191462	0.37013
KIRC	1.92452e-05	0.999656	-0.0204069	0.647967	-0.108751	0.0146788	-0.0328279	0.46244	NA	1	0.0900307	0.0435924	NA	1	-0.141912	0.0014178	0.022079	0.6213	-0.0960782	0.0312062	0.0839919	0.0597842	-0.153706	0.00054166	0.0955107	0.0322216	-0.11764	0.00826621	-0.0229717	0.60726	0.0431575	0.333944	0.0131625	0.768389	0.0487254	0.275393	0.0536195	0.229972	-0.0359831	0.420664	NA	1	0.186345	2.60175e-05
KIRP	-0.11743	0.107561	0.0259492	0.723012	0.00804714	0.91249	-0.152404	0.0363001	NA	1	0.276327	0.000125853	NA	1	-0.148054	0.0420408	0.0375602	0.607865	NA	1	NA	1	-0.0598557	0.413269	-0.115692	0.112904	-0.0894473	0.220955	-0.330244	3.46973e-06	-0.0991948	0.174309	0.200915	0.0055692	0.0340345	0.641983	0.296664	3.39661e-05	0.0168398	0.8181	NA	1	0.17333	0.0170712
LAML	0.371809	2.59483e-06	-0.30336	0.00015285	-0.0347682	0.671363	0.147481	0.070744	NA	1	0.234019	0.0039051	NA	1	NA	1	0.215177	0.00797035	NA	1	-0.102802	0.209087	0.193228	0.0174474	-0.0406483	0.619839	NA	1	NA	1	-0.241327	0.00283507	NA	1	NA	1	-0.128442	0.116014	0.0235887	0.773734	-0.062348	0.446945	-0.192597	0.0178249
LGG	-0.00472396	0.929392	NA	1	-0.0381762	0.473991	-0.0611601	0.251082	NA	1	-0.114733	0.0309137	NA	1	0.17418	0.000999116	-0.141092	0.00784761	NA	1	0.0765699	0.150528	-0.0461909	0.386235	-0.00976761	0.854695	0.0138507	0.795103	0.0716265	0.178753	-0.00797029	0.881155	0.0360035	0.499533	-0.0155741	0.770282	0.0751927	0.158027	-0.0591995	0.266626	-0.0805148	0.13054	-0.0630184	0.236941
LIHC	-0.0555882	0.436661	0.1796	0.0113475	-0.0905195	0.204518	-0.121749	0.0875078	NA	1	0.0956351	0.180007	NA	1	0.117456	0.0993519	0.0584323	0.413524	NA	1	NA	1	0.116473	0.102236	-0.20801	0.00327515	0.124949	0.0794417	0.1084	0.128474	-0.1909	0.00713544	0.188933	0.00768196	-0.0835704	0.241782	-0.350267	4.22197e-07	0.347266	5.37542e-07	NA	1	0.224747	0.00145621
LUAD	0.0822909	0.0612675	-0.0620117	0.158744	0.0166638	0.705061	-0.0876007	0.0462863	NA	1	0.00547972	0.900952	-0.215887	7.0405e-07	0.0157301	0.720967	0.110498	0.0118516	NA	1	-0.153478	0.000455816	0.0738461	0.0931633	0.0278707	0.526787	-0.0501038	0.254994	-0.126672	0.00388083	-0.100044	0.0228108	0.0566825	0.197749	0.146037	0.00085727	0.136406	0.00186081	-0.0605274	0.168972	NA	1	0.0724786	0.0994006
LUSC	0.151252	0.000920329	-0.0243575	0.595655	0.185976	4.5076e-05	-0.0623419	0.174046	NA	1	-0.0586955	0.200585	-0.156276	0.00061429	0.0601237	0.189904	-0.0754747	0.0996782	NA	1	-0.0265923	0.562344	0.136217	0.00287196	-0.0300319	0.512897	-0.175474	0.000117024	-0.205049	6.34238e-06	-0.273861	1.38907e-09	-0.0318837	0.487243	0.227892	4.89158e-07	-0.0261133	0.569409	0.0372524	0.416934	NA	1	-0.0785027	0.0867732
MESO	-0.0143762	0.897999	0.134412	0.228615	9.79549e-05	0.999303	-0.238189	0.031401	NA	1	0.0810723	0.468263	-0.273621	0.0128692	0.139716	0.210601	-0.0964962	0.388462	-0.183827	0.0982921	0.194457	0.0800138	0.31026	0.00471727	0.102967	0.357289	-0.299273	0.0063079	-0.178463	0.108681	0.196112	0.0774924	0.152662	0.170928	0.129657	0.245652	0.24903	0.0240633	-0.209204	0.0592584	NA	1	0.0153197	0.891344
OV	-0.0265484	0.651418	-0.00760467	0.897047	-0.0586225	0.318132	-0.136492	0.0196321	NA	1	0.0248485	0.672223	NA	1	0.131039	0.0251397	-0.016508	0.778788	NA	1	NA	1	0.102895	0.0791914	0.192435	0.000949191	0.0363662	0.53594	0.00346784	0.952949	-0.0890664	0.128846	0.0890308	0.129052	0.0645945	0.271242	0.0370914	0.527834	-0.0380494	0.517221	NA	1	0.053439	0.362876
PAAD	-0.000628539	0.993746	-0.0280125	0.726801	0.185036	0.0200561	-0.190461	0.0166466	NA	1	-0.0709521	0.375282	NA	1	-0.0728974	0.362695	-0.00684336	0.931993	NA	1	NA	1	0.263408	0.000825931	-0.12828	0.108208	0.155597	0.0509144	0.0462108	0.564239	-0.093792	0.240845	-0.154694	0.052291	0.0550197	0.492325	-0.18142	0.0225328	0.122396	0.125513	NA	1	-0.0307963	0.700889
PCPG	-0.222894	0.23644	0.14231	0.453149	-0.0883204	0.641408	-0.116809	0.538742	NA	1	0.09099	0.631308	NA	1	-0.180014	0.341152	-0.115374	0.543776	NA	1	-0.169149	0.371556	-0.102604	0.589519	0.0478522	0.801734	-0.149437	0.430601	-0.0758913	0.690197	0.140378	0.457739	0.115772	0.54238	0.00680006	0.971551	0.0176439	0.926269	0.178623	0.344959	NA	1	0.461575	0.0102422
PRAD	-0.0687069	0.218736	NA	1	0.0368295	0.509993	0.0434021	0.437451	NA	1	0.0145382	0.794851	NA	1	-0.00947789	0.865469	0.0124981	0.823219	NA	1	NA	1	-0.115288	0.0386761	0.0932048	0.0949922	0.152762	0.00602	0.175662	0.00155333	-0.20726	0.000185689	0.0886552	0.112331	0.201737	0.00026897	-0.220016	6.84553e-05	0.118336	0.033782	NA	1	NA	1
READ	-0.126619	0.141857	0.0633948	0.463426	0.0846	0.327032	0.075984	0.378829	NA	1	0.0510472	0.554607	-0.126386	0.142598	-0.169439	0.0486063	0.0297655	0.73085	NA	1	NA	1	-0.0372622	0.666696	NA	1	-0.0295549	0.73237	-0.0996577	0.248358	0.0241162	0.780226	NA	1	-0.0929243	0.281927	NA	1	0.0785029	0.363192	NA	1	-0.0427532	0.621159
SARC	0.195728	0.00441287	-0.247387	0.000294596	0.068967	0.319908	-0.115702	0.0944663	NA	1	0.204101	0.0030134	-0.225568	0.000995473	-0.0929426	0.179682	-0.128434	0.0632011	0.0124399	0.857778	NA	1	-0.165247	0.0165357	-0.142353	0.0392954	0.0517549	0.455654	-0.133522	0.0533562	-0.0685672	0.322452	0.0729471	0.292709	-0.0171864	0.804454	0.0748221	0.280446	-0.00956887	0.890366	NA	1	-0.0880746	0.203666
SKCM	0.0252753	0.640879	-0.0125948	0.816215	0.0491282	0.364175	-0.170598	0.00153848	NA	1	-0.0272206	0.615397	-0.0705505	0.192415	-0.00212652	0.968699	0.0130766	0.809316	-0.0339416	0.530992	NA	1	0.0752105	0.164589	-0.0763577	0.158226	0.118365	0.0283899	-0.107145	0.0473875	0.0319147	0.555637	-0.0560674	0.300479	0.0850273	0.115991	-0.023151	0.669194	0.103122	0.0563961	NA	1	NA	1
STAD	-0.0307742	0.563316	-0.0592186	0.265792	0.0448236	0.399795	-0.0991468	0.06203	NA	1	-0.0870611	0.101471	-0.129497	0.0146229	0.128243	0.0156168	0.0485445	0.36179	NA	1	-0.0897591	0.091289	0.289908	2.65273e-08	NA	1	0.0409777	0.44149	-0.0972976	0.0670842	-0.211793	5.99076e-05	-0.130225	0.0140714	0.24881	2.0723e-06	-0.183508	0.000511026	0.154732	0.00346999	NA	1	0.121462	0.0220839
TGCT	0.0569123	0.496102	NA	1	0.105668	0.205637	-0.0586089	0.483778	NA	1	0.208861	0.0118198	-0.0505617	0.54587	-0.204811	0.0134675	0.0222859	0.790187	NA	1	0.0758228	0.364708	-0.191954	0.0207239	-0.169469	0.0416779	-0.13214	0.113112	0.0773973	0.354387	-0.0368446	0.659595	0.0917829	0.272219	NA	1	0.0971523	0.245034	NA	1	NA	1	NA	1
THCA	0.21103	0.000249444	NA	1	-0.160809	0.00547367	-0.126847	0.0288406	NA	1	-0.0806876	0.165369	NA	1	-0.141386	0.014745	-0.100767	0.0829752	NA	1	0.147266	0.0110502	-0.0178238	0.759681	-0.0226375	0.697622	0.188946	0.0010678	-0.266816	3.10641e-06	0.076976	0.185743	0.0596602	0.305484	0.121295	0.0366834	0.0865404	0.136774	0.000202806	0.997223	NA	1	NA	1
THYM	-0.102867	0.267657	NA	1	-0.389413	1.31014e-05	-0.163586	0.0767589	NA	1	0.470314	7.71094e-08	NA	1	-0.0137792	0.882119	-0.310532	0.00062082	NA	1	-0.375911	2.72997e-05	0.381664	2.0046e-05	-0.471583	7.0365e-08	0.012062	0.896853	0.346685	0.000131961	0.432024	1.03451e-06	-0.283483	0.00186643	0.284105	0.00182188	0.153604	0.0967788	NA	1	NA	1	NA	1
UCEC	0.068463	0.178369	-0.00647621	0.898817	-0.0717187	0.158489	-0.158417	0.00174708	NA	1	-0.0529152	0.298492	NA	1	-0.177803	0.000433024	0.00807175	0.874075	NA	1	-0.119055	0.018981	0.138297	0.00636297	-0.0794335	0.118269	0.0448077	0.378748	-0.25796	2.57317e-07	0.014598	0.774392	0.0903531	0.0754623	0.269614	6.89599e-08	-0.260214	2.0045e-07	0.284426	1.1795e-08	NA	1	0.189538	0.000172984
UCS	0.283107	0.136709	-0.28506	0.133908	0.0125631	0.948428	-0.249754	0.190664	NA	1	0.0283286	0.884022	NA	1	-0.106897	0.579598	-0.0324176	0.867418	0.0385317	0.842697	NA	1	0.0635468	0.742644	-0.187284	0.330634	-0.400985	0.0319699	-0.115082	0.552207	-0.30197	0.111489	0.124324	0.520514	0.106456	0.582571	0.0270585	0.889189	0.12721	0.510801	NA	1	NA	1
UVM	-0.2	0.456391	NA	1	0.157469	0.560274	-0.197059	0.463185	NA	1	0.0970588	0.721358	-0.205355	0.445479	-0.0617647	0.822182	0.279399	0.294641	-0.0118288	0.96532	NA	1	0.126471	0.640554	0.25604	0.338481	0.0352941	0.899718	-0.105882	0.696767	0.0911765	0.737903	NA	1	NA	1	0.373529	0.154768	NA	1	NA	1	NA	1

## Sheet: chemokines
Relationship between DDR1 expression and levels of immune-related genes in pan-cancer
Cancer Type	chemokines
	CCL19		CCL20		CCL21		CCL24		CCL26		CCL27		CCL28		XCL1		XCL2		CXCL1		CXCL2		CXCL3		CCL19		CXCL6		CCL20		CCL21		CXCL10		CXCL11		CXCL13		CXCL14
	Correlation	P-value	Correlation	P-value	Correlation	P-value	Correlation	P-value	Correlation	P-value	Correlation	P-value	Correlation	P-value	Correlation	P-value	Correlation	P-value	Correlation	P-value	Correlation	P-value	Correlation	P-value	Correlation	P-value	Correlation	P-value	Correlation	P-value	Correlation	P-value	Correlation	P-value	Correlation	P-value	Correlation	P-value	Correlation	P-value
ACC	-0.116738	0.305572	-0.367405	0.000865902	-0.0797903	0.48455	0.0334745	0.769623	-0.0286028	0.802412	0	1	0.157805	0.164842	0.071319	0.532241	-0.0159874	0.888784	-0.415836	0.000138269	-0.215373	0.0566236	-0.411621	0.000164059	-0.317196	0.00439522	-0.369066	0.000816801	-0.250264	0.0261171	-0.273276	0.0148182	-0.306768	0.00596332	-0.350956	0.00151828	-0.33588	0.00247629	0.0739852	0.516983
BLCA	-0.27838	9.45036e-09	0.065386	0.185849	-0.247823	3.61018e-07	-0.16695	0.00067837	-0.282898	5.301e-09	0	1	0.0387483	0.433362	-0.142827	0.00371224	-0.309979	1.32718e-10	0.139541	0.00459415	-0.174021	0.000393681	-0.129685	0.00848226	-0.0708174	0.151824	0.154272	0.00170775	0.185238	0.000158947	-0.234242	1.57623e-06	-0.152492	0.00193367	-0.103366	0.0361902	-0.198664	4.99694e-05	-0.0369151	0.45545
BRCA	-0.105979	0.000419903	-0.161597	6.71079e-08	-0.0383981	0.202359	-0.112781	0.000173306	-0.267807	1.37688e-19	-0.00232742	0.938429	0.070612	0.0189527	-0.17224	8.43436e-09	-0.177677	2.77698e-09	-0.167952	1.97621e-08	-0.14885	6.76932e-07	-0.187473	3.43481e-10	-0.084847	0.00478648	-0.159507	9.92959e-08	-0.180866	1.42427e-09	-0.154762	2.37182e-07	-0.168565	1.75202e-08	-0.161012	7.49331e-08	-0.201702	1.34332e-11	-0.0481686	0.109689
CESC	-0.00206762	0.971266	0.0712374	0.214006	-0.0373151	0.515496	0.0340356	0.553105	0.0114177	0.842327	0	1	0.193462	0.000667577	-0.151041	0.00813215	-0.123378	0.0309551	0.00527783	0.92674	-0.0472148	0.410507	-0.0162498	0.777092	-0.0468235	0.414402	0.0288046	0.615727	0.0200922	0.726288	-0.00271575	0.962265	0.0290893	0.612239	-0.0282592	0.62243	-0.0479902	0.402856	0.00967669	0.866124
CHOL	-0.215386	0.207101	0.0775811	0.6529	-0.179155	0.295801	-0.0531105	0.758361	-0.0949194	0.581865	0	1	-0.138423	0.420754	-0.241939	0.155136	-0.247093	0.146259	0.278923	0.0994856	0.0317113	0.854328	0.0278689	0.871823	0.0509099	0.768093	0.252541	0.137286	0.398603	0.016042	-0.164631	0.337309	-0.0388601	0.821966	-0.0804125	0.641069	-0.312617	0.0634057	-0.0487968	0.777471
COAD	0.00225376	0.961093	-0.0364228	0.430329	-0.0119549	0.795811	0.219764	1.46637e-06	0.0462183	0.316864	0	1	0.0395432	0.391864	-0.132073	0.00408787	-0.232753	3.25208e-07	-0.199618	1.27297e-05	-0.274763	1.32519e-09	-0.203893	8.18938e-06	-0.310003	5.97754e-12	-0.270391	2.46092e-09	-0.30348	1.71872e-11	-0.254963	2.00411e-08	-0.299029	3.48144e-11	-0.294924	6.60458e-11	-0.25242	2.79547e-08	0.076659	0.096569
DLBC	-0.0338532	0.819316	0.159641	0.278436	0.0241133	0.870769	0.161544	0.272672	0.0491825	0.739915	0	1	-0.217192	0.138113	0.093969	0.525244	0.0154619	0.916927	0.165376	0.261305	0.282559	0.0516691	0.268456	0.0650492	0.228644	0.118024	0.131672	0.372343	0.247403	0.0900095	-7.01617e-05	0.999622	0.0805733	0.586166	0.0508393	0.731476	0.0518628	0.726278	-0.0763107	0.606195
ESCA	-0.2084	0.0077851	-0.194888	0.0129481	-0.0496425	0.530436	-0.0771593	0.3291	0.155535	0.048115	0	1	-0.0358336	0.650764	0.0419749	0.595869	-0.210146	0.00727363	-0.0823808	0.297324	-0.255583	0.00102875	-0.210593	0.00714745	-0.253819	0.00111761	-0.188974	0.0160241	-0.0606554	0.443233	-0.263104	0.000717932	-0.21863	0.00518908	-0.262285	0.000746991	-0.238972	0.00219448	0.0805932	0.307966
GBM	-0.179817	0.0196833	-0.290424	0.000134066	-0.163651	0.0340369	-0.300499	7.56742e-05	-0.488856	1.77842e-11	0	1	-0.291369	0.00012718	-0.537195	6.04593e-14	-0.510451	1.56732e-12	-0.22971	0.00274162	-0.149027	0.0538582	-0.11548	0.136063	-0.200849	0.00904058	-0.355074	2.327e-06	-0.172174	0.0256373	-0.188359	0.0144808	-0.143607	0.0632977	-0.0275326	0.723139	-0.421588	1.26191e-08	-0.1969	0.0105228
HNSC	0.0448903	0.315483	0.0323495	0.469567	-0.0926274	0.0380202	0.0322381	0.471099	0.193064	1.32495e-05	0	1	0.162438	0.00025748	0.0622491	0.163745	-0.0876088	0.0497873	-0.0560274	0.210145	-0.146035	0.00103285	-0.114982	0.00992773	-0.0410454	0.358759	-0.0345031	0.440495	-0.0557944	0.21205	-0.0822289	0.0656373	-0.124916	0.00506629	-0.182211	4.01252e-05	-0.059818	0.180863	0.0562083	0.208673
KICH	-0.0838027	0.506884	-0.303248	0.0140669	0.215847	0.0841908	0.114077	0.365554	-0.535095	4.38545e-06	0	1	0.0489136	0.698805	-0.189217	0.131148	-0.0207713	0.869549	-0.480679	5.06356e-05	-0.367871	0.00257146	-0.497279	2.50812e-05	-0.520193	8.93925e-06	-0.496923	2.54721e-05	-0.23175	0.0632329	0.0114012	0.928177	0.182778	0.14503	0.171633	0.171603	-0.331149	0.00704973	-0.196007	0.117626
KIRC	-0.227842	9.93525e-08	-0.193075	6.86678e-06	-0.123029	0.00437414	-0.0554779	0.200126	-0.313921	1.06369e-13	0	1	0.034354	0.427786	-0.249309	5.0473e-09	-0.208998	1.07831e-06	-0.0265815	0.539544	-0.122382	0.00458634	-0.128197	0.00297292	-0.0961033	0.0262277	0.0188293	0.663894	-0.0553736	0.200974	-0.135918	0.00162675	-0.0481292	0.266451	-0.0941677	0.029417	-0.276294	7.88617e-11	0.00474478	0.912813
KIRP	-0.270084	3.18683e-06	-0.113321	0.0543152	-0.130311	0.0267507	-0.0793672	0.178458	-0.268647	3.61024e-06	0	1	0.458226	2.07887e-16	-0.27318	2.43027e-06	-0.263416	5.65005e-06	0.137671	0.01921	0.0073202	0.90139	0.0937152	0.11189	0.25537	1.10481e-05	0.274546	2.15391e-06	0.0919612	0.11879	-0.253301	1.30809e-05	-0.304875	1.24464e-07	-0.274765	2.11261e-06	-0.230905	7.4308e-05	-0.233732	6.02228e-05
LAML	-0.034964	0.669958	-0.111098	0.174445	-0.0843798	0.302964	0.0968633	0.236742	-0.0984188	0.229262	0.164926	0.0430029	0.340747	1.85876e-05	0.349298	1.10344e-05	0.359602	5.76654e-06	-0.0243732	0.766422	0.0106663	0.896579	0.050371	0.539073	0.108497	0.184816	-0.0702876	0.391118	-0.0132645	0.871582	0.0829879	0.311038	0.175725	0.03091	0.0995365	0.223991	0.0578634	0.480362	0.211687	0.00907331
LGG	-0.0050277	0.908156	-0.0879381	0.0432063	-0.00658298	0.879935	0.0632215	0.146472	0.0650047	0.135398	0.0841222	0.0531545	-0.268799	3.30495e-10	-0.0146305	0.737079	0.0235044	0.589612	-0.148939	0.000588877	0.0648046	0.136607	0.0881048	0.0428101	0.165517	0.000131147	-0.0907013	0.0370244	-0.09099	0.036424	0.061426	0.158307	0.108393	0.0126137	0.0379463	0.383746	0.114421	0.00843546	-0.191154	9.55356e-06
LIHC	0.111535	0.0310448	0.380402	2.52946e-14	0.204676	6.6833e-05	-0.0488426	0.346207	0.29737	4.4963e-09	0	1	0.476072	1.49067e-22	0.13185	0.010696	0.0437972	0.398352	0.44272	2.20342e-19	-0.0193896	0.708585	0.401737	6.1445e-16	0.334679	3.06816e-11	0.427452	4.80683e-18	0.416264	4.17577e-17	0.0896154	0.0834944	0.0104871	0.839809	0.02858	0.581652	0.0160623	0.756857	0.25833	4.07601e-07
LUAD	-0.0375499	0.390092	-0.136844	0.00165625	-0.0802416	0.0659291	-0.175401	5.24159e-05	-0.240627	2.29856e-08	0	1	0.112673	0.00970356	-0.167285	0.000115877	-0.289506	1.29288e-11	-0.0411153	0.346643	-0.0851946	0.0508414	-0.102439	0.0187732	-0.133026	0.00223383	-0.0185222	0.671693	-0.161257	0.000204078	-0.231984	7.39017e-08	-0.276441	1.11008e-10	-0.187241	1.54349e-05	-0.267477	4.55105e-10	0.0108571	0.80381
LUSC	-0.229508	2.06123e-07	-0.0469253	0.294507	-0.237191	7.7593e-08	-0.179067	5.56186e-05	0.132767	0.00290621	0	1	-0.0798777	0.0740517	0.077296	0.0839196	-0.312133	8.78051e-13	0.0477269	0.286327	-0.196002	9.91135e-06	-0.165373	0.000200862	-0.219673	6.85426e-07	0.0630125	0.159046	-0.0777377	0.0821598	-0.311016	1.0679e-12	-0.270995	6.99106e-10	-0.271579	6.40551e-10	-0.257612	4.893e-09	0.0720798	0.107086
MESO	-0.00962935	0.929881	-0.238647	0.0269107	-0.432005	3.27617e-05	-0.260217	0.0155339	-0.322314	0.00247414	0	1	0.168005	0.12205	-0.157226	0.148254	-0.170615	0.116275	0.199924	0.0649551	-0.156372	0.150497	-0.285713	0.00766107	-0.0775531	0.477863	0.237391	0.0277486	-0.166618	0.125206	-0.298919	0.00517836	-0.218658	0.043112	-0.188484	0.0822176	-0.236717	0.0282076	0.106503	0.329066
OV	-0.11322	0.0275261	-0.0235928	0.64706	-0.119509	0.0199519	0.0515876	0.316511	-0.298867	2.93316e-09	0	1	0.0495011	0.336507	0.000254491	0.99606	-0.0575412	0.263809	0.0210402	0.683052	0.000562252	0.991295	0.00027858	0.995687	-0.000685344	0.98939	-0.00157707	0.975588	0.0271434	0.598348	0.0382287	0.45806	0.138777	0.00681227	0.0971777	0.058748	0.0189961	0.712406	-0.181074	0.000395876
PAAD	-0.250435	0.000747426	0.234719	0.0016124	-0.25257	0.000670711	0.291919	7.69474e-05	0.0205232	0.785688	0	1	0.235594	0.00154681	-0.13285	0.0770939	-0.350793	1.58163e-06	0.113141	0.132661	0.0107152	0.887115	0.164791	0.0279386	-0.0240554	0.749936	0.118263	0.115898	0.0631685	0.402215	-0.228059	0.00220085	-0.190554	0.0108411	-0.093819	0.2129	-0.33202	5.96581e-06	0.0540595	0.473568
PCPG	-0.0342494	0.645316	0.177649	0.0161332	0.0213177	0.774544	0.0356142	0.632201	-0.11303	0.127647	0	1	0.061429	0.408757	0.0593235	0.425034	-0.0476945	0.52143	0.064206	0.387862	-0.0448198	0.546868	0.0563926	0.448306	0.14271	0.0539561	0.043212	0.561357	0.141538	0.0559788	0.0238685	0.748422	0.036196	0.626645	0.0219466	0.768078	-0.0720736	0.332259	-0.0241101	0.745962
PRAD	0.044814	0.317765	0.210628	2.06836e-06	0.0437863	0.329002	0.100227	0.0251607	-0.244378	3.21409e-08	0	1	0.386614	3.08524e-19	0.000379611	0.993251	-0.0153122	0.732945	0.206292	3.37231e-06	0.126321	0.0047126	0.119179	0.00769692	0.138402	0.00194283	0.276287	3.40881e-10	0.124013	0.0055369	0.185021	3.20127e-05	0.247384	2.14914e-08	0.215359	1.19913e-06	-0.044179	0.324678	0.0136372	0.761218
READ	-0.0134448	0.863086	-0.0466251	0.54962	-0.0300739	0.699639	0.142366	0.0664596	-0.138494	0.074276	0	1	0.138044	0.0752312	-0.0862145	0.267934	-0.0150193	0.847237	-0.0230511	0.767468	-0.161004	0.0376557	0.0273229	0.725961	-0.160246	0.0385768	-0.247922	0.00123626	-0.158041	0.041367	-0.167357	0.0306372	-0.219998	0.00428029	-0.238119	0.00194333	-0.17897	0.0206597	0.0967807	0.213422
SARC	-0.133417	0.0305389	-0.148517	0.0159327	-0.0966303	0.117988	-0.0884747	0.15249	-0.403397	1.03124e-11	0	1	0.442963	4.58098e-14	-0.299667	7.3882e-07	-0.282002	3.38168e-06	-0.286484	2.3212e-06	0.0246656	0.69051	-0.0763114	0.217401	-0.121093	0.0498013	-0.181734	0.00309788	-0.127677	0.0385279	-0.264993	1.33008e-05	-0.265194	1.30935e-05	-0.220935	0.000305469	-0.290989	1.57981e-06	-0.083094	0.179122
SKCM	-0.156942	0.000630359	0.105343	0.0222253	-0.10506	0.022588	-0.100233	0.0296287	-0.076052	0.0992451	0	1	0.0507659	0.271536	-0.156759	0.000639784	-0.185738	5.00023e-05	0.117148	0.0109463	-0.066652	0.14866	-0.0520092	0.259956	-0.0348596	0.450392	0.0881775	0.0558356	0.116877	0.011133	-0.159328	0.000518872	-0.150835	0.00102483	-0.118097	0.0103121	-0.174835	0.000136902	0.0196449	0.670652
STAD	-0.348402	3.83917e-12	0.103921	0.0443091	-0.301325	2.60683e-09	-0.0235763	0.649043	-0.084784	0.101149	0	1	0.207072	5.33569e-05	-0.131164	0.0110066	-0.263898	2.15431e-07	0.278739	4.04439e-08	0.160337	0.00184123	0.222277	1.39611e-05	-0.0135682	0.793413	0.113983	0.0273071	0.134083	0.00933355	-0.115497	0.0253117	-0.0516443	0.318563	-0.0286744	0.579895	-0.249193	1.02493e-06	0.0288158	0.578028
TGCT	-0.137683	0.0865274	0.294091	0.000194231	-0.169673	0.034213	-0.134213	0.0948404	-0.493502	5.91898e-11	0	1	-0.147637	0.0658785	-0.210255	0.00842651	-0.46254	1.2094e-09	0.235865	0.00303478	-0.0484997	0.547678	0.100534	0.211763	0.272096	0.000589918	0.424742	3.2705e-08	-0.0814546	0.312081	-0.215113	0.00700096	-0.35414	5.74664e-06	-0.32362	3.77312e-05	-0.395693	3.17604e-07	0.381152	9.15921e-07
THCA	-0.191193	1.37816e-05	0.0745136	0.09277	-0.146198	0.000928523	-0.0123754	0.780397	-0.150031	0.000676016	0	1	-0.0226573	0.609713	-0.173643	8.08855e-05	-0.183844	2.95061e-05	-0.0534836	0.227922	0.106767	0.0158597	0.0303918	0.493459	0.0161637	0.715742	-0.0654826	0.139739	0.111585	0.011681	-0.132891	0.00263775	-0.119277	0.0070036	-0.178024	5.28109e-05	-0.216818	7.67942e-07	0.149679	0.000696251
THYM	-0.401136	6.15314e-06	0.0724669	0.433506	-0.23143	0.0113274	0.0144455	0.876091	-0.321748	0.000359474	0	1	0.207676	0.0234308	0.197889	0.0309819	0.0807682	0.382552	0.529233	6.09823e-10	-0.304083	0.000773437	-0.399539	6.75118e-06	0.436836	6.80389e-07	0.515357	2.00694e-09	-0.0199074	0.829851	0.343347	0.000131932	0.4033	5.42254e-06	0.312122	0.00054895	-0.143823	0.118645	-0.3399	0.000155589
UCEC	-0.249052	3.41657e-09	0.151031	0.000388401	-0.151466	0.000373423	0.0685216	0.109096	-0.156187	0.00024212	0	1	0.203884	1.49017e-06	-0.00783373	0.854824	-0.160551	0.000160433	0.152493	0.000340215	0.0803964	0.0600021	0.0625448	0.14368	0.153928	0.000298379	0.0963403	0.0241102	0.157539	0.000213383	-0.204012	1.46737e-06	-0.0300141	0.483199	-0.0508692	0.234491	-0.202207	1.82298e-06	-0.177471	2.9382e-05
UCS	-0.0194485	0.886867	0.232416	0.0847616	-0.0512823	0.707398	0.182346	0.178599	-0.224093	0.0968492	0	1	0.312499	0.0190353	0.0011146	0.993495	0.00785733	0.954168	0.492666	0.000114689	0.293246	0.0282768	0.315033	0.0180357	0.0979629	0.472583	0.431676	0.000894123	0.427733	0.00100819	0.0776556	0.569441	0.129159	0.342764	0.111852	0.411802	0.0611814	0.654201	0.256873	0.0559903
UVM	-0.233574	0.0370507	-0.152392	0.177183	-0.209712	0.0618988	-0.265303	0.0173886	-0.322666	0.0035104	0	1	0.340042	0.00202818	-0.219479	0.050453	-0.297275	0.00740881	-0.0856085	0.450223	-0.145362	0.198255	-0.119653	0.290435	-0.0177899	0.87554	0.00458812	0.967781	0.027925	0.805771	-0.30775	0.00548599	-0.259609	0.0200455	-0.203858	0.0697139	-0.194321	0.0841294	0.0254409	0.822754

## Sheet: chemokines receptor
Relationship between DDR1 expression and levels of immune-related genes in pan-cancer
Cancer Type	chemokines receptor
	CCR1		CCR2		CCR3		CCR4		CCR5		CCR6		CCR8		CCR9		XCR1		CXCR1		CXCR2		CXCR3		CXCR4		CXCR6		CX3CR1
	Correlation	P-value	Correlation	P-value	Correlation	P-value	Correlation	P-value	Correlation	P-value	Correlation	P-value	Correlation	P-value	Correlation	P-value	Correlation	P-value	Correlation	P-value	Correlation	P-value	Correlation	P-value	Correlation	P-value	Correlation	P-value	Correlation	P-value
ACC	-0.180595	0.111227	-0.0304766	0.789757	0.150709	0.184917	0.0130877	0.90886	-0.111893	0.326215	0	1	0.240202	0.032986	0.185143	0.102361	0.146594	0.197341	-0.402985	0.000231276	-0.346678	0.00174863	-0.154914	0.172818	-0.0164068	0.885886	-0.121862	0.28468	0.0460494	0.686958
BLCA	-0.382701	8.75583e-16	-0.294785	1.10153e-09	0.000964103	0.984454	-0.185787	0.00015184	-0.304492	2.89053e-10	-0.165102	0.000779359	-0.127627	0.00959415	-0.136989	0.00540486	-0.0175558	0.722699	-0.0662243	0.180259	0.325135	1.41996e-11	-0.298689	6.47048e-10	-0.355232	1.14308e-13	-0.267074	3.83872e-08	-0.034636	0.48377
BRCA	-0.268371	1.14828e-19	-0.210704	1.52103e-12	-0.00274099	0.927516	-0.177579	2.83443e-09	-0.216264	3.7673e-13	-0.031207	0.300212	-0.151413	4.31768e-07	-0.170957	1.09063e-08	-0.160159	8.79159e-08	0.0181202	0.547548	-0.126158	2.62435e-05	-0.171531	9.72447e-09	-0.247327	7.53087e-17	-0.260403	1.43522e-18	-0.01543	0.608558
CESC	-0.0728444	0.203825	-0.0280852	0.624575	0.0277155	0.629144	0.168939	0.00303205	-0.0433681	0.449719	0.180339	0.00153623	0.165784	0.00363372	0.0425974	0.457823	0.0565656	0.324019	-0.10206	0.0746397	0.0499601	0.383802	-0.0799717	0.162882	-0.092394	0.106729	-0.042832	0.455347	0.0891392	0.119704
CHOL	-0.12612	0.463589	-0.239502	0.159467	0.0464039	0.788128	-0.29134	0.0847128	-0.211202	0.216276	-0.484239	0.00276639	-0.088322	0.608488	-0.235766	0.166274	-0.345089	0.0392779	0.0427562	0.804447	0.0463823	0.788225	-0.343117	0.0404905	-0.0839064	0.626591	-0.239311	0.159809	0.115563	0.502116
COAD	-0.283785	3.56676e-10	-0.258317	1.28491e-08	-0.162757	0.000390346	-0.216688	2.0676e-06	-0.219317	1.54199e-06	-0.0698042	0.130344	-0.186829	4.50611e-05	-0.0809735	0.0791663	-0.17775	0.000105189	-0.213628	2.89587e-06	-0.254279	2.1926e-08	0.153228	0.000848926	-0.0486464	0.292081	-0.275422	1.20594e-09	-0.142485	0.00193592
DLBC	0.0440194	0.766405	-0.105092	0.477161	0.176597	0.229862	0.0193981	0.895883	-0.0124661	0.932981	0.166381	0.258378	0.0478321	0.746816	0.0377013	0.799181	-0.0227504	0.878016	0.155158	0.292331	0.196723	0.180198	0.130407	0.376991	-0.0729818	0.622039	0.0143407	0.922932	-0.22342	0.126894
ESCA	-0.346643	6.2193e-06	-0.353241	4.01248e-06	0.0230636	0.770808	-0.366349	1.63077e-06	-0.324619	2.504e-05	-0.215961	0.00577842	-0.316364	4.10813e-05	-0.0738489	0.350335	-0.156787	0.0463206	-0.199694	0.0108428	-0.0491584	0.534458	-0.258548	0.000893853	-0.145879	0.0639859	-0.305007	7.93008e-05	-0.137296	0.0814692
GBM	-0.190313	0.0134754	-0.406773	4.46275e-08	-0.146544	0.0580265	-0.275963	0.000293744	-0.168297	0.0292078	-0.030511	0.69461	-0.189447	0.0139133	-0.0362187	0.641147	-0.249463	0.00111026	-0.122024	0.115096	-0.0657084	0.397422	-0.318008	2.66139e-05	-0.277115	0.000276381	-0.419618	1.49796e-08	0.162189	0.0356902
HNSC	-0.0913565	0.0407513	-0.0855579	0.0554046	-0.0301187	0.500763	0.0469621	0.293645	-0.0664624	0.137003	0.0646018	0.148366	0.0924631	0.0383643	0.0232209	0.603728	0.0382816	0.392059	-0.13672	0.00214024	-0.0928943	0.0374667	-0.0786781	0.0782133	0.00740193	0.868604	-0.0645496	0.148694	0.0438624	0.326704
KICH	-0.271499	0.0286921	-0.236635	0.0577161	-0.202823	0.105153	-0.185038	0.140036	-0.139251	0.268599	0	1	0.0625263	0.620737	0.236459	0.0579087	-0.407332	0.000758222	-0.451034	0.000162829	-0.285309	0.0212387	-0.169679	0.176607	-0.127497	0.311488	-0.0489647	0.698506	0.191167	0.127149
KIRC	-0.187586	1.25642e-05	-0.0300677	0.487683	-0.0472824	0.274966	-0.0372145	0.390309	-0.137346	0.00145006	-0.0380394	0.379882	-0.108777	0.0118154	0.1094	0.0113377	-0.0562314	0.194074	0.061972	0.152304	0.0859759	0.0468493	-0.193862	6.2882e-06	-0.223985	1.64681e-07	-0.195236	5.38761e-06	0.117002	0.0067438
KIRP	-0.272164	2.65732e-06	-0.0187906	0.750421	-0.0414897	0.482324	-0.106093	0.0717269	-0.186092	0.00148467	0.094072	0.110526	-0.237086	4.67725e-05	0.0483153	0.413198	-0.159724	0.00650795	0.103146	0.0800228	0.0902727	0.125742	-0.253839	1.25209e-05	-0.138638	0.0183724	-0.105621	0.0730061	0.0726687	0.218082
LAML	0.0164927	0.840702	0.218822	0.00694682	0.121028	0.138792	0.295242	0.000233024	0.244256	0.00250743	0.208083	0.010352	0.223505	0.00580427	0.0775365	0.344	0.145545	0.074565	-0.0170067	0.835806	-0.194175	0.0168934	0.271658	0.000740476	0.0536052	0.5133	0.341995	1.72424e-05	0.0621579	0.448334
LGG	0.117798	0.00667968	0.0687851	0.114064	-0.0117096	0.788167	-0.0374357	0.390183	0.100614	0.0206392	0	1	0.0480748	0.269705	-0.251699	4.35407e-09	0.0308753	0.47856	-0.0842412	0.0528178	0.0429738	0.32388	0.030556	0.483122	0.216416	5.02189e-07	0.044899	0.302656	0.0948242	0.0292046
LIHC	0.140929	0.00633449	0.160324	0.00186906	-0.0606785	0.241753	0.269871	1.15644e-07	0.240668	2.50042e-06	0.212699	3.3658e-05	0.205043	6.48086e-05	0.0100415	0.84653	0.0732506	0.157433	0.184391	0.000337343	0.235758	4.04186e-06	0.152469	0.00311625	0.443569	1.84785e-19	0.117222	0.0233776	0.291069	9.76298e-09
LUAD	-0.264865	6.79916e-10	-0.250458	5.75957e-09	-0.0932306	0.0325341	-0.160048	0.000228074	-0.261681	1.1027e-09	-0.106985	0.0140929	-0.180591	3.09669e-05	-0.0671006	0.124293	0.00504551	0.908094	-0.0167845	0.700935	-0.0210805	0.629538	-0.0808811	0.0637955	-0.219709	3.59419e-07	-0.348659	1.76239e-16	0.103267	0.0178318
LUSC	-0.362036	5.82121e-17	-0.388983	1.51764e-19	-0.211785	1.72771e-06	-0.348455	9.50214e-16	-0.343074	2.76906e-15	-0.287513	5.44184e-11	-0.249494	1.51169e-08	-0.267864	1.11284e-09	-0.100873	0.0239475	-0.122364	0.00610001	0.00873978	0.845285	-0.329678	3.63284e-14	-0.375414	3.25433e-18	-0.392261	7.08226e-20	-0.182859	3.83048e-05
MESO	-0.120997	0.26711	0.0546714	0.617105	-0.00626764	0.954327	-0.208731	0.0537717	-0.137687	0.206156	0.00714426	0.947948	-0.266769	0.0130322	-0.164042	0.131235	-0.243508	0.0238659	0.167317	0.123607	0.132551	0.223751	-0.242992	0.0241745	-0.289795	0.00680045	-0.207187	0.0556092	0.275322	0.0102978
OV	0.112052	0.0291773	0.0534516	0.299318	0.0715419	0.164543	-0.0141564	0.783547	0.114938	0.0252445	0.10492	0.0412055	0.0575407	0.263813	-0.0187495	0.715978	0.0950312	0.0645832	0.0817367	0.11214	0.0808022	0.116317	0.0555537	0.280687	0.147742	0.00394448	0.0022544	0.965109	0.117296	0.0223801
PAAD	-0.388752	8.20757e-08	-0.296714	5.77749e-05	-0.016112	0.830968	-0.301904	4.21259e-05	-0.352663	1.3792e-06	-0.245849	0.000940168	-0.270382	0.000262082	0.00528279	0.944206	-0.223321	0.0027317	-0.141113	0.0602675	-0.156901	0.0364788	-0.160462	0.032385	-0.165648	0.0271238	-0.335269	4.77042e-06	-0.0907759	0.228181
PCPG	0.0776524	0.296096	0.112616	0.129056	0.204907	0.0053937	0.1599	0.0306031	0.0847123	0.254217	0	1	0.128974	0.0818514	-0.0791695	0.286731	0.0857962	0.248169	0.103613	0.162771	0.159851	0.0306546	-0.0191272	0.79718	0.00679667	0.927243	0.0375355	0.613931	0.159018	0.0315461
PRAD	0.124193	0.00546816	0.153206	0.000594578	-0.0289659	0.518563	0.102276	0.0223159	0.131864	0.0031661	0.0633156	0.157881	0.111429	0.012751	0.0734423	0.101281	0.0662454	0.139482	-0.0392098	0.382107	0.240486	5.37035e-08	0.130695	0.00344743	0.0140054	0.754974	0.0510503	0.255012	0.234767	1.12378e-07
READ	-0.153789	0.0472241	-0.0979243	0.208036	-0.0649901	0.404038	-0.0847706	0.276061	-0.101203	0.19314	0.00584282	0.940263	-0.13247	0.0879042	0.10475	0.177911	0.063591	0.414253	-0.160718	0.0380017	-0.163822	0.0343912	0.264294	0.000557779	-0.00442623	0.954728	-0.0907735	0.243351	0.0960371	0.216977
SARC	-0.39582	2.68959e-11	-0.0845309	0.171695	-0.175002	0.0044198	-0.117721	0.0565645	-0.143548	0.0198622	-0.0291145	0.638349	-0.144877	0.0187364	0.00232586	0.970055	-0.19628	0.00137841	-0.201275	0.00102987	0.08079	0.191522	-0.228846	0.000181569	-0.0924418	0.134858	-0.211024	0.000571459	0.250357	4.01968e-05
SKCM	-0.121781	0.00815003	-0.149581	0.00112997	-0.156139	0.000672651	-0.163022	0.000381763	-0.198776	1.38685e-05	-0.166745	0.000278355	-0.179809	8.71052e-05	-0.10189	0.0270253	-0.159588	0.000507872	0.0363773	0.430906	0.0706762	0.125598	-0.184899	5.41426e-05	-0.16114	0.000446704	-0.19437	2.15979e-05	-0.0425998	0.356276
STAD	-0.196739	0.000125742	-0.275435	5.92065e-08	-0.0642457	0.214517	-0.305063	1.61748e-09	-0.254718	5.76859e-07	-0.203142	7.43011e-05	-0.117947	0.0223489	-0.126305	0.0143838	-0.169698	0.000969687	-0.0662979	0.200202	-0.0305661	0.555143	-0.213707	3.00734e-05	-0.281994	2.76479e-08	-0.186625	0.000279176	-0.244694	1.62061e-06
TGCT	-0.346802	9.20042e-06	-0.0903944	0.261759	-0.378669	1.09196e-06	-0.0841616	0.296218	-0.274252	0.000531157	0.012524	0.876685	-0.353451	6.00944e-06	0.205602	0.0100273	-0.0645807	0.423154	-0.0722054	0.37038	0.0115308	0.886395	-0.291486	0.000222606	0.0604929	0.453155	-0.220067	0.00577219	0.436436	1.23052e-08
THCA	0.0498158	0.261465	-0.0673641	0.12869	0.248089	1.36365e-08	-0.106365	0.0162616	-0.119966	0.00668059	-0.100524	0.0231869	-0.00779138	0.860667	0.0232942	0.599696	-0.219266	5.7168e-07	-0.11443	0.00969984	-0.0426912	0.335961	-0.177713	5.44504e-05	-0.199465	5.64673e-06	-0.145431	0.000988557	0.155593	0.000420817
THYM	0.179692	0.0505283	0.0354637	0.701794	-0.118161	0.200592	-0.190336	0.0381355	0.175396	0.0563959	0.0796721	0.389064	-0.0213567	0.817672	-0.453075	2.29207e-07	-0.369809	3.48397e-05	-0.0787369	0.394672	0.0563683	0.542591	-0.182925	0.0464531	-0.579902	4.81388e-12	0.0776916	0.400998	0.555745	5.3593e-11
UCEC	-0.0351247	0.41186	-0.220979	1.73307e-07	0.0323171	0.450253	-0.0869772	0.0418215	-0.184056	1.45166e-05	-0.0373869	0.382384	-0.00903606	0.832848	0.0839969	0.0493794	-0.0912522	0.0327007	0.100812	0.0182467	0.128307	0.00261946	-0.206525	1.08126e-06	-0.0348825	0.415095	-0.218243	2.47492e-07	0.212137	5.39215e-07
UCS	0.152369	0.26226	0.128286	0.346065	0.106955	0.432701	0.0534317	0.695718	0.0724583	0.595628	0	1	0.128659	0.34465	0.338673	0.0106745	0.078612	0.564681	0.307738	0.0210401	0.315943	0.0176881	0.0172941	0.89933	0.221687	0.100582	0.0794999	0.560278	0.221991	0.100104
UVM	-0.257899	0.0209085	-0.156639	0.165273	-0.168078	0.136146	-0.173098	0.124664	-0.216479	0.0537662	-0.106922	0.345169	-0.170643	0.130183	-0.142303	0.207965	-0.243717	0.0293671	-0.155695	0.167868	-0.070018	0.537128	-0.271678	0.0147786	-0.100661	0.374312	-0.242254	0.0303844	0.241544	0.030889

[truncated: 6 more sheets: MHC, Immunoinhibitory, Immunostimulator, Immune checkpoint inhibitors, Immune checkpoint stimulator, IC50]
